# Supplementary material
Source: Springer Nature journal article supplement (https://www.springermedizin.de/resource/supplementary/12958_2009_601_MOESM6_ESM.pdf/9568068)

**A**

IVF rates

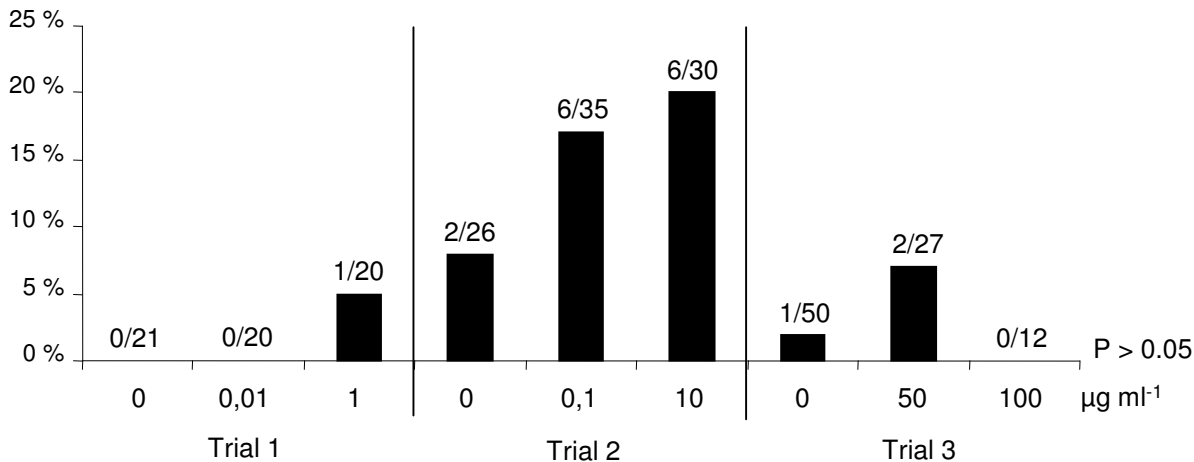**B**

IVF rates

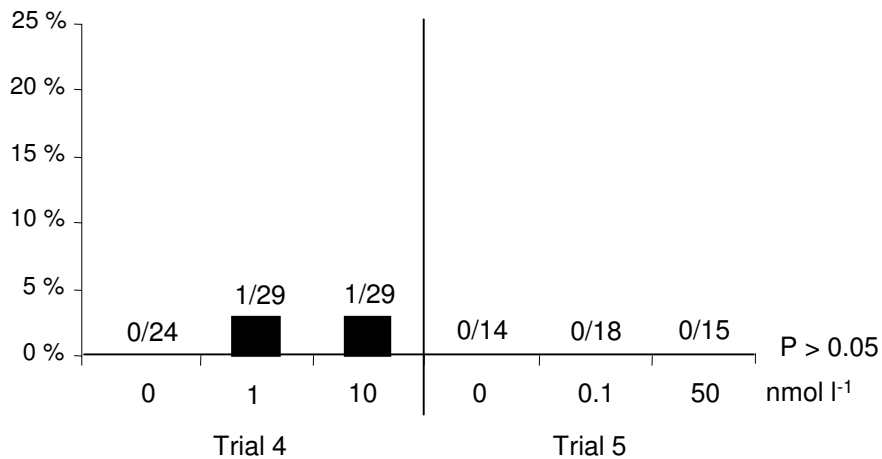

Supplement: MOESM6 [file 9568068]
